# Supplementary material
Source: Springer Nature journal article supplement (https://www.springermedizin.de/resource/supplementary/12939_2010_208_MOESM5_ESM.pdf/9550598)

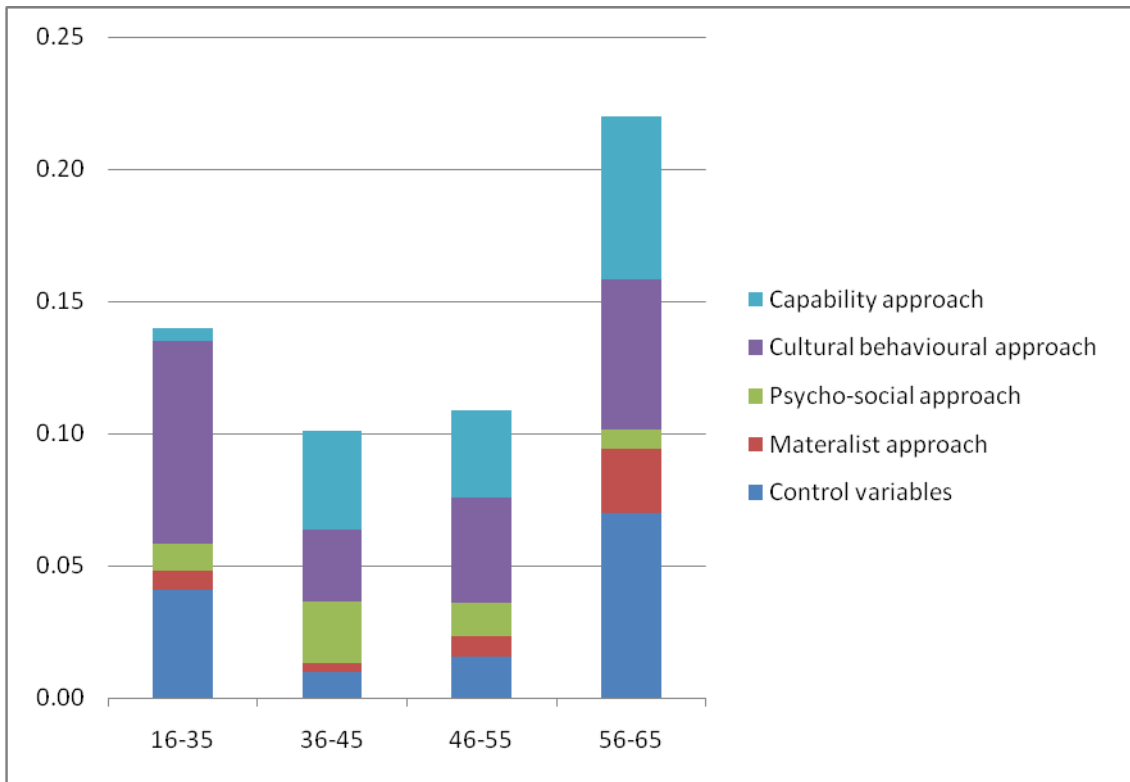

Supplement: MOESM5 [file 9550598]
